# Supplementary material for: Insights into the growth of bismuth nanoparticles on 2D structured BiOCl photocatalysts: an in situ TEM investigation
Source: Royal Society of Chemistry journal article supplement (doi:10.1039/c5dt02217g), 2015-01-01
Supplement: c5dt02217g1.pdf [file c5dt02217g1.pdf]

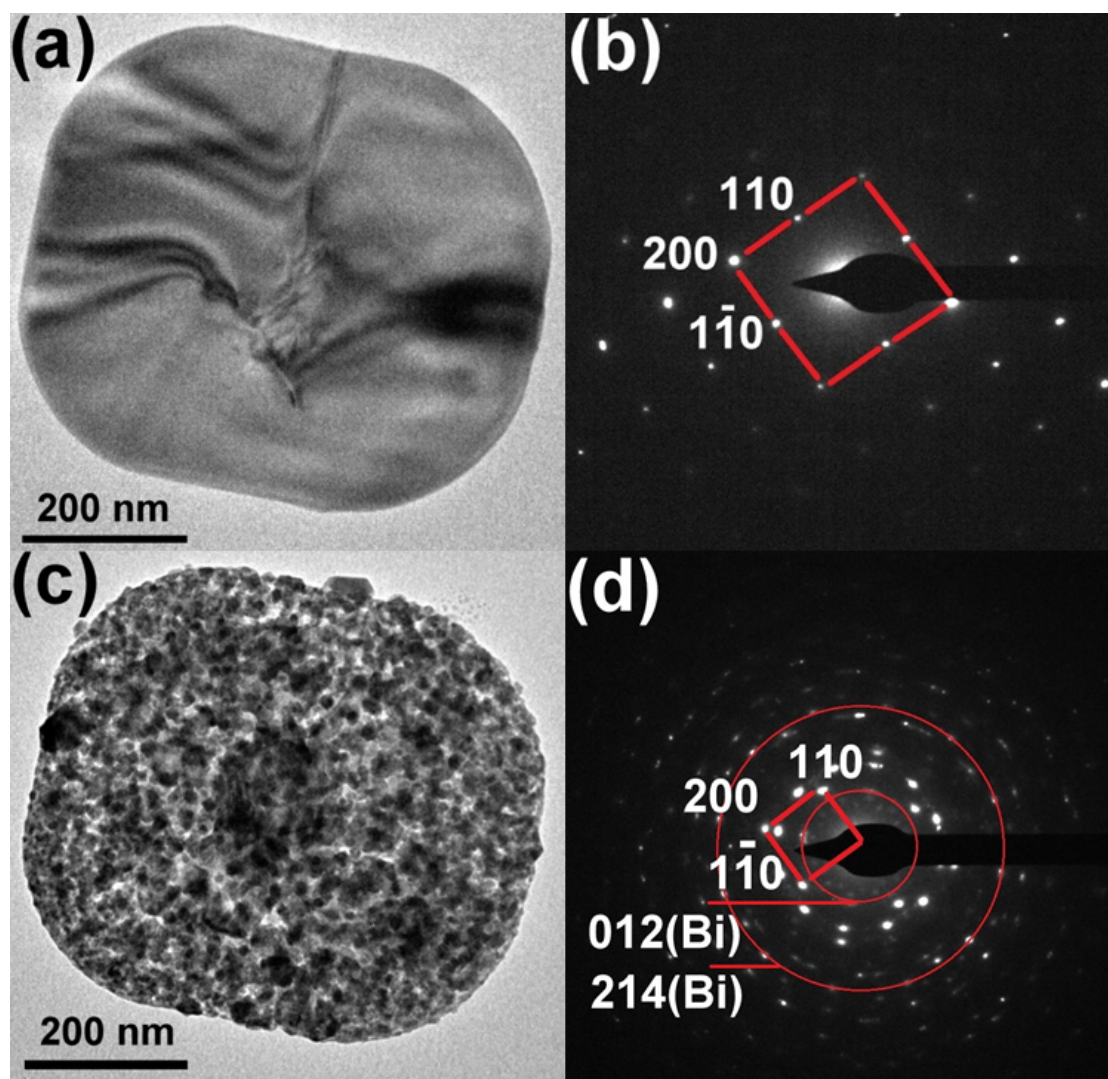

Fig.S1 TEM images and the corresponding SAED patterns of an as prepared BiOCl nanosheet on formvar support film before (a, b) and after  $e^-$  beam irradiation (dose rate:  $7.8 \times 10^5 \text{ e/nm}^2 \cdot \text{s}$ ) for 30 mins (c, d).

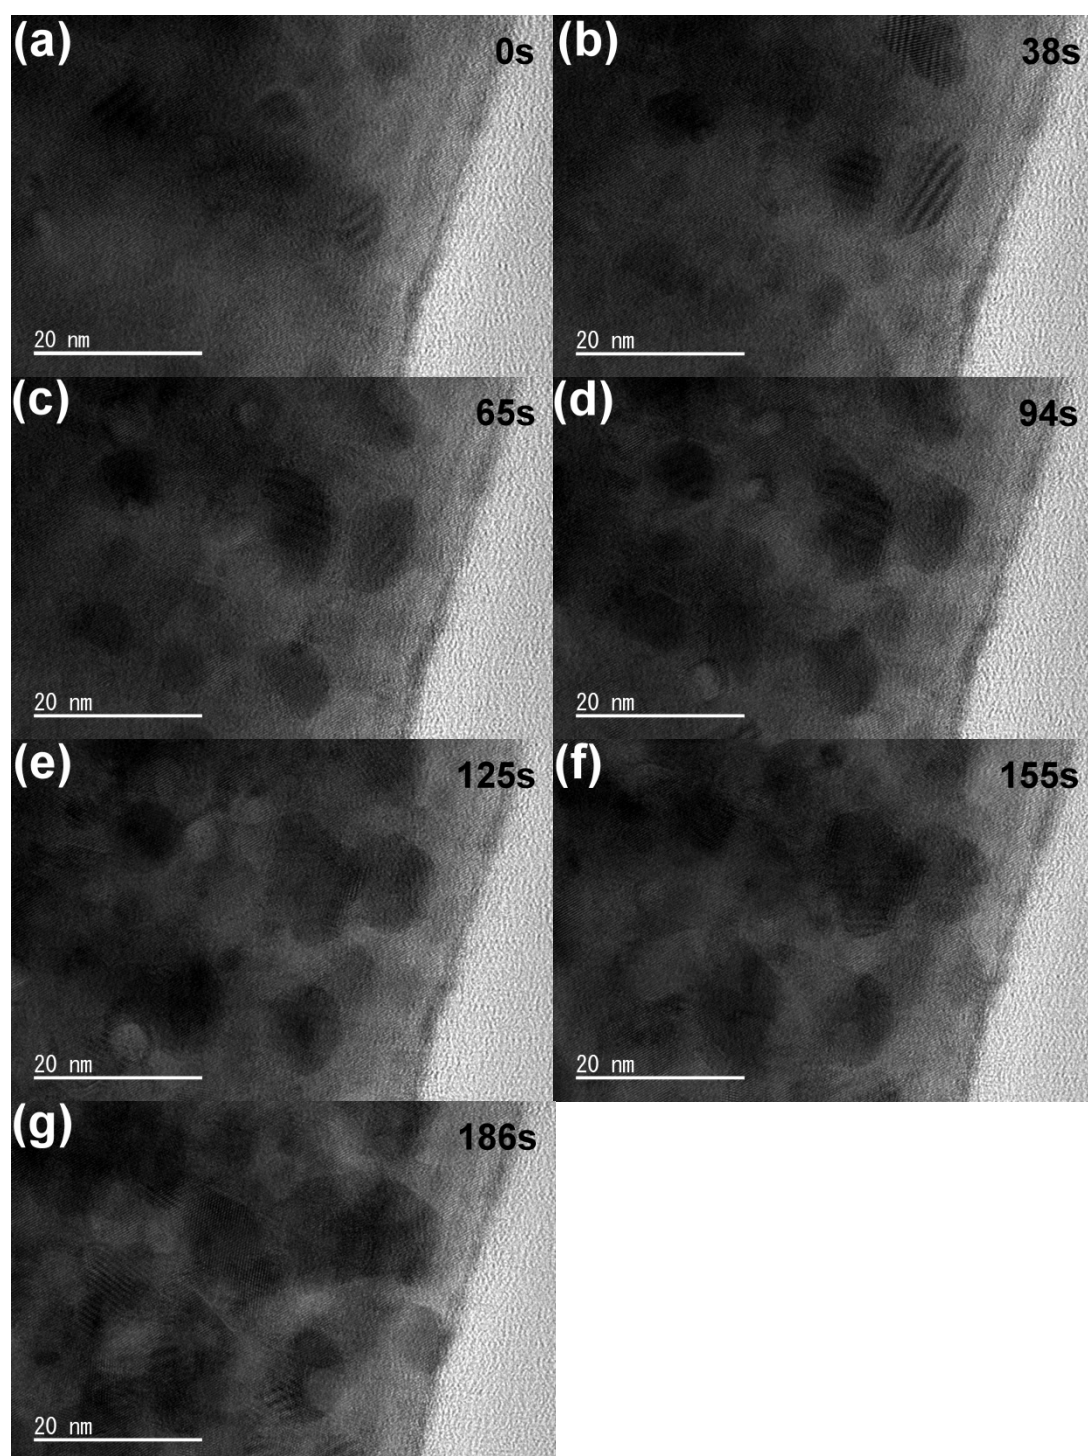

Fig. S2 A time series of low-mag TEM images showing the in situ growth of bismuth nanoparticles (dose rate:  $2.6 \times 10^5 \text{ e/nm}^2 \cdot \text{s}$ ).

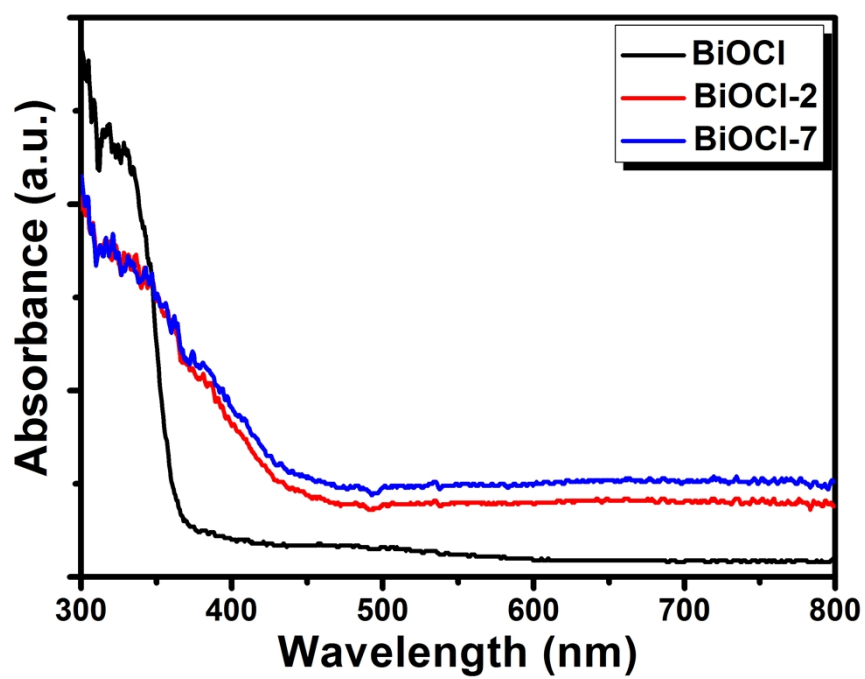

Fig. S3 UV-Vis absorption spectra of pure BiOCl and Bi/BiOCl composite photocatalysts prepared by UV-induced photoreduction method.
